# Supplementary material for: Surface mapping of photocatalytic activity in heterogeneous TiO 2 films
Source: Royal Society of Chemistry journal article supplement (doi:10.1039/d4ta03692a), 2024-01-01
Supplement: d4ta03692a1.pdf [file d4ta03692a1.pdf]

## Surface mapping of photocatalytic activity in heterogeneous TiO<sub>2</sub> films

R. Lee<sup>1</sup>, S. Park<sup>2</sup>, S. Sathasivam<sup>2</sup>, A. Mills,<sup>3</sup> I.P. Parkin<sup>1</sup>, R. Palgrave\*<sup>1</sup>, R. Quesada-Cabrera\*<sup>1,4</sup>

<sup>1</sup> Department of Chemistry, UCL (University College London), 20 Gordon St, London WC1H 0AJ, United Kingdom

<sup>2</sup> School of Engineering, London South Bank University, 103 Borough Rd, London SE1 0AA, United Kingdom

<sup>3</sup> School of Chemistry and Chemical Engineering, Queen's University Belfast, David Keir Building, Stranmillis Rd, Belfast BT9 5AG, United Kingdom

<sup>4</sup> Department of Chemistry, Institute of Environmental Studies and Natural Resources (iUNAT-FEAM), Universidad de Las Palmas de Gran Canaria, Campus de Tafira, Las Palmas 35017, Spain

Corresponding Authors: [raul.quesada@ulpgc.es](mailto:raul.quesada@ulpgc.es); [r.palgrave@ucl.ac.uk](mailto:r.palgrave@ucl.ac.uk)

### Supplementary Information

#### Irradiation Conditions

**Table S1.** Irradiance,  $I$  (units, mW cm<sup>-2</sup>) and corresponding quantum flux,  $E$  (units, mol cm<sup>-2</sup> s<sup>-1</sup>) measured across the photoreactor under UVA light ( $\lambda = 365$  nm). Averaged values were, respectively, 1.93(±0.05) mW cm<sup>-2</sup> and 5.9(±0.16)×10<sup>-9</sup> mol cm<sup>-2</sup> s<sup>-1</sup>.

|          |                                                               | A    | B    | C    | D    | E    | F    | G    | H    | I    | J    | K    | L    |
|----------|---------------------------------------------------------------|------|------|------|------|------|------|------|------|------|------|------|------|
| Anatase  | $I$<br>(mW cm <sup>-2</sup> )                                 | 1.83 | 1.84 | 1.85 | 1.85 | 1.86 | 1.86 | 1.87 | 1.87 | 1.88 | 1.89 | 1.89 | 1.90 |
|          | $E \times 10^{-9}$<br>(mol cm <sup>-2</sup> s <sup>-1</sup> ) | 5.60 | 5.61 | 5.63 | 5.65 | 5.67 | 5.68 | 5.70 | 5.72 | 5.74 | 5.75 | 5.77 | 5.79 |
| r-centre | $I$<br>(mW cm <sup>-2</sup> )                                 | 1.90 | 1.91 | 1.91 | 1.92 | 1.93 | 1.93 | 1.94 | 1.94 | 1.95 | 1.95 | 1.96 | 1.97 |
|          | $E \times 10^{-9}$<br>(mol cm <sup>-2</sup> s <sup>-1</sup> ) | 5.81 | 5.82 | 5.84 | 5.86 | 5.88 | 5.89 | 5.91 | 5.93 | 5.95 | 5.96 | 5.98 | 6.00 |
| r-corner | $I$<br>(mW cm <sup>-2</sup> )                                 | 1.97 | 1.98 | 1.98 | 1.99 | 1.99 | 2.00 | 1.99 | 1.99 | 1.98 | 1.98 | 1.97 | 1.97 |
|          | $E \times 10^{-9}$<br>(mol cm <sup>-2</sup> s <sup>-1</sup> ) | 6.02 | 6.03 | 6.05 | 6.07 | 6.08 | 6.10 | 6.08 | 6.07 | 6.05 | 6.03 | 6.02 | 6.00 |

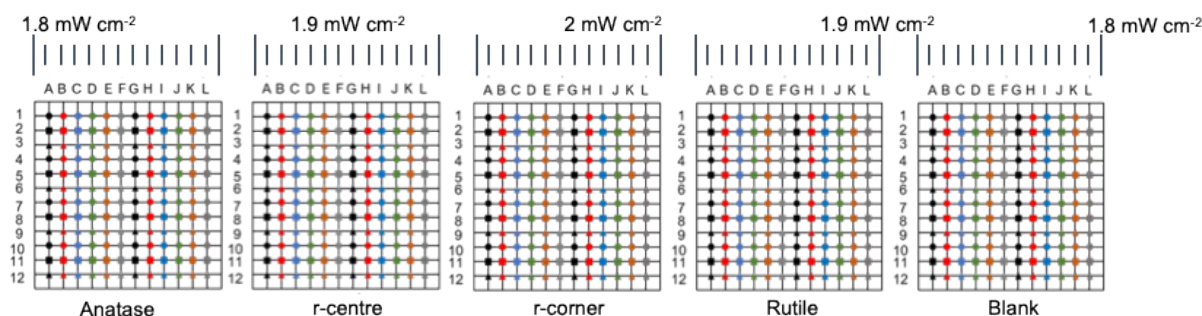

Film characterisation

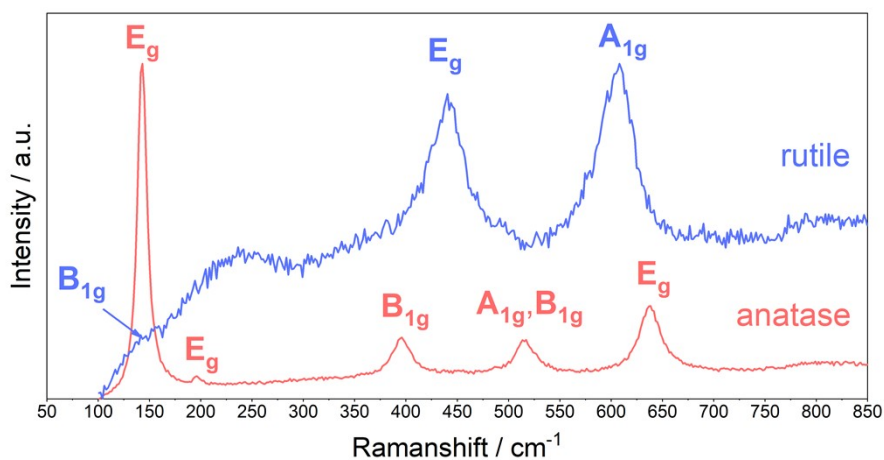

**Fig. S1.** Raman spectra recorded on the anatase (red line) and rutile (blue line) ‘parent’ films. The assigned modes confirm the presence of the anatase and rutile phases (*e.g.*, Li Bassi *et al. J. Appl. Phys.* 2005, 98, 074305).

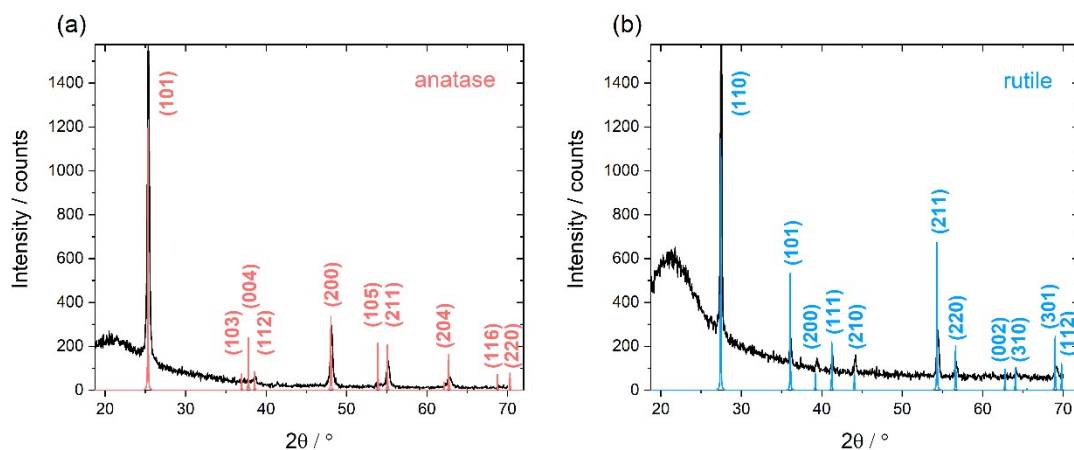

**Fig. S2.** XRD spectra recorded on the (a) anatase and (b) rutile ‘parent’ films. The peaks are in agreement with reference patterns recorded on pure phase powders.

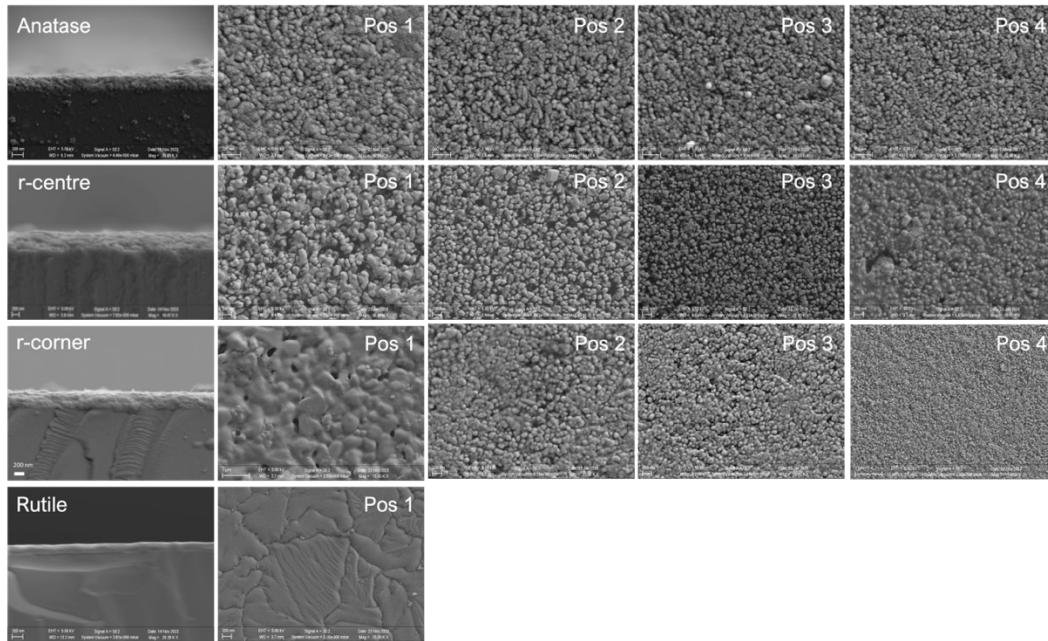

**Fig. S3.** Side-on and top-down SEM images of pure and mixed-phase TiO<sub>2</sub> samples (positions as in Fig. 1).

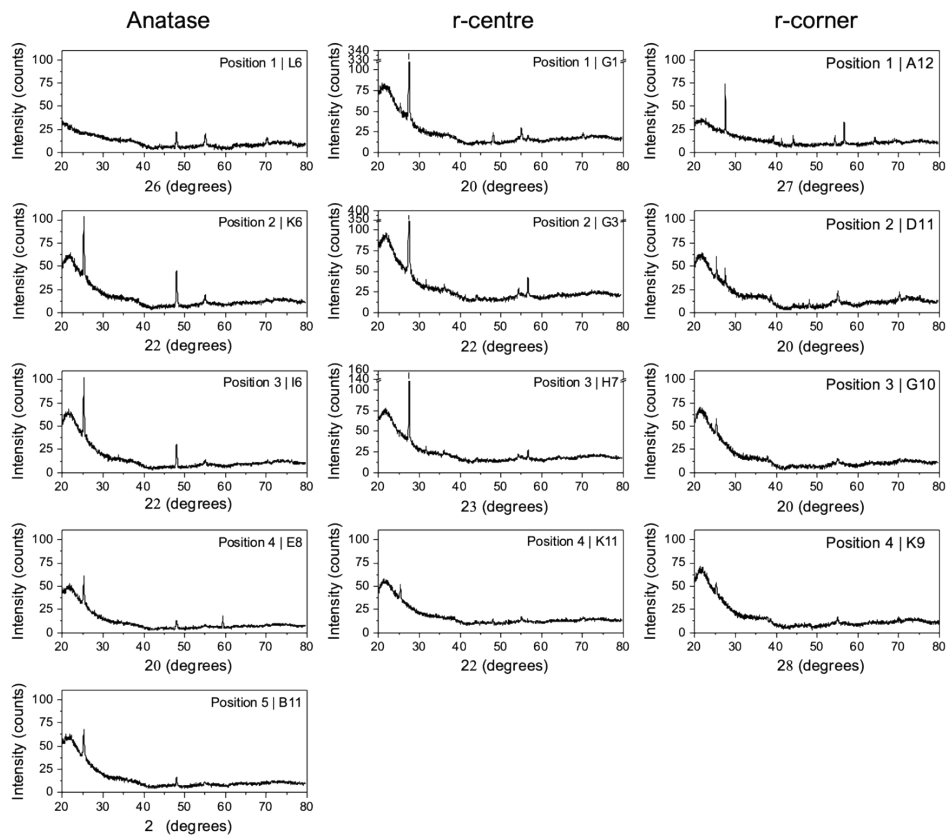

**Fig. S4.** X-ray diffraction patterns at selected positions (Fig. 1) on anatase, r-centre and r-corner samples.

**Table S2.** Surface phase composition determined via VB XPS mapping across a 12×12 grid on r-centre and r-corner samples. The values are given in % anatase phase.

**r-centre**

|    | A   | B   | C   | D   | E   | F   | G   | H   | I   | J   | K   | L   |
|----|-----|-----|-----|-----|-----|-----|-----|-----|-----|-----|-----|-----|
| 1  | 80  | 100 | 91  | 100 | 100 | 84  | 100 | 100 | 100 | 94  | 99  | 100 |
| 2  | 100 | 95  | 96  | 97  | 96  | 100 | 94  | 100 | 100 | 100 | 97  | 97  |
| 3  | 96  | 100 | 97  | 100 | 100 | 100 | 96  | 100 | 100 | 100 | 100 | 100 |
| 4  | 100 | 100 | 97  | 100 | 100 | 98  | 92  | 100 | 100 | 100 | 100 | 100 |
| 5  | 100 | 94  | 100 | 96  | 62  | 58  | 86  | 98  | 100 | 100 | 100 | 100 |
| 6  | 93  | 100 | 100 | 74  | 36  | 23  | 58  | 82  | 100 | 100 | 100 | 100 |
| 7  | 98  | 100 | 95  | 65  | 25  | 28  | 36  | 69  | 98  | 100 | 96  | 100 |
| 8  | 100 | 97  | 98  | 70  | 42  | 24  | 32  | 48  | 90  | 100 | 92  | 100 |
| 9  | 100 | 100 | 100 | 95  | 54  | 33  | 39  | 63  | 100 | 100 | 100 | 99  |
| 10 | 100 | 95  | 98  | 98  | 99  | 98  | 98  | 100 | 100 | 100 | 100 | 96  |
| 11 | 100 | 100 | 100 | 100 | 100 | 100 | 100 | 100 | 100 | 100 | 98  | 100 |
| 12 | 85  | 100 | 100 | 100 | 100 | 100 | 99  | 100 | 100 | 100 | 100 | 100 |

**r-corner**

|    | A   | B   | C   | D   | E   | F   | G   | H   | I   | J   | K   | L   |
|----|-----|-----|-----|-----|-----|-----|-----|-----|-----|-----|-----|-----|
| 1  | 90  | 96  | 98  | 97  | 95  | 98  | 100 | 100 | 100 | 99  | 100 | 100 |
| 2  | 100 | 93  | 100 | 100 | 97  | 97  | 96  | 97  | 100 | 94  | 99  | 100 |
| 3  | 100 | 98  | 95  | 98  | 98  | 100 | 100 | 96  | 100 | 100 | 98  | 100 |
| 4  | 100 | 97  | 100 | 100 | 94  | 100 | 100 | 100 | 94  | 100 | 95  | 99  |
| 5  | 97  | 97  | 99  | 97  | 99  | 100 | 100 | 100 | 100 | 98  | 98  | 100 |
| 6  | 100 | 100 | 97  | 100 | 96  | 100 | 100 | 100 | 96  | 97  | 99  | 100 |
| 7  | 100 | 100 | 100 | 100 | 100 | 100 | 100 | 100 | 98  | 100 | 100 | 97  |
| 8  | 100 | 100 | 97  | 100 | 100 | 98  | 100 | 100 | 95  | 100 | 100 | 100 |
| 9  | 2   | 100 | 100 | 100 | 100 | 94  | 100 | 100 | 97  | 100 | 100 | 94  |
| 10 | 2   | 0   | 100 | 100 | 100 | 100 | 100 | 100 | 95  | 100 | 96  | 93  |
| 11 | 5   | 4   | 3   | 100 | 93  | 100 | 97  | 100 | 98  | 100 | 100 | 97  |
| 12 | 68  | 17  | 1   | 100 | 100 | 98  | 98  | 95  | 96  | 100 | 98  | 94  |

*Photocatalytic mapping*

The full photocatalytic mapping across the surfaces followed changes in normalised red component  $R_r$  of resazurin dye (Fig. S5). The corresponding  $ttb(90)$  values are listed in Table S3.

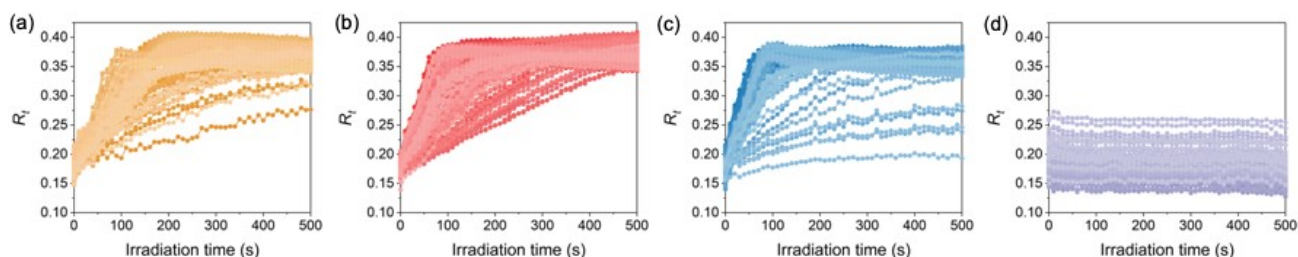

**Fig. S5.** Normalised red component  $R_r$  curves as a function of irradiation time on (a) anatase; (b) r-centre; (c) r-corner; and (d) rutile samples.

**Table S3.** Time to bleach 90% of the red component of the ink,  $t_{b(90)}$ , across a 12×12 grid on anatase, r-centre and r-corner samples. Positions highlighted in grey were inactive and did not reach a plateau.

**Anatase**

|    | A | B   | C   | D   | E   | F   | G   | H   | I   | J   | K   | L   |
|----|---|-----|-----|-----|-----|-----|-----|-----|-----|-----|-----|-----|
| 1  |   | 416 | 231 | 215 | 221 | 222 | 238 | 313 | 308 | 294 | 292 | 448 |
| 2  |   | 190 | 168 | 189 | 198 | 169 | 138 | 159 | 143 | 107 | 91  | 250 |
| 3  |   | 181 | 162 | 177 | 188 | 170 | 164 | 164 | 145 | 106 | 94  | 173 |
| 4  |   | 179 | 164 | 173 | 177 | 178 | 169 | 160 | 141 | 101 | 92  | 170 |
| 5  |   | 177 | 168 | 170 | 173 | 188 | 185 | 159 | 137 | 106 | 84  | 161 |
| 6  |   | 175 | 167 | 166 | 168 | 169 | 182 | 171 | 141 | 99  | 81  | 163 |
| 7  |   | 169 | 163 | 160 | 155 | 176 | 181 | 171 | 121 | 91  | 77  | 133 |
| 8  |   | 170 | 162 | 157 | 160 | 172 | 175 | 161 | 118 | 98  | 85  | 175 |
| 9  |   | 186 | 164 | 156 | 166 | 170 | 160 | 151 | 132 | 101 | 87  | 172 |
| 10 |   | 204 | 160 | 155 | 159 | 157 | 152 | 142 | 134 | 112 | 88  | 240 |
| 11 |   | 212 | 169 | 160 | 155 | 158 | 144 | 136 | 131 | 124 | 107 | 363 |
| 12 |   |     | 420 | 344 | 326 | 322 | 308 | 307 | 349 | 343 | 349 |     |

**r-centre**

|    | A   | B   | C   | D   | E   | F   | G   | H   | I   | J   | K   | L   |
|----|-----|-----|-----|-----|-----|-----|-----|-----|-----|-----|-----|-----|
| 1  | 322 | 220 | 157 | 139 | 160 | 173 | 160 | 155 | 159 | 156 | 230 | 370 |
| 2  | 313 | 158 | 90  | 87  | 90  | 83  | 75  | 72  | 66  | 64  | 75  | 307 |
| 3  | 317 | 120 | 99  | 110 | 119 | 132 | 130 | 115 | 89  | 69  | 76  | 331 |
| 4  | 309 | 118 | 125 | 166 | 329 | 333 | 327 | 256 | 168 | 91  | 80  | 282 |
| 5  | 279 | 112 | 129 | 321 | 498 | 479 | 417 | 329 | 258 | 130 | 99  | 259 |
| 6  | 203 | 89  | 125 | 370 | 517 | 582 | 471 | 345 | 241 | 165 | 104 | 231 |
| 7  | 133 | 79  | 116 | 315 | 535 | 629 | 651 | 489 | 300 | 209 | 100 | 155 |
| 8  | 123 | 85  | 103 | 250 | 434 | 552 | 560 | 490 | 336 | 209 | 90  | 140 |
| 9  | 117 | 73  | 78  | 145 | 278 | 399 | 428 | 356 | 262 | 130 | 75  | 166 |
| 10 | 136 | 62  | 67  | 98  | 159 | 247 | 279 | 237 | 131 | 94  | 72  | 147 |
| 11 | 149 | 55  | 62  | 79  | 98  | 115 | 122 | 119 | 104 | 82  | 79  | 150 |
| 12 | 216 | 90  | 87  | 101 | 107 | 118 | 124 | 126 | 116 | 116 | 178 | 363 |

**r-corner**

|    | A   | B   | C   | D  | E   | F   | G   | H   | I   | J   | K   | L   |
|----|-----|-----|-----|----|-----|-----|-----|-----|-----|-----|-----|-----|
| 1  | 87  | 70  | 72  | 78 | 101 | 104 | 87  | 78  | 78  | 77  | 91  | 124 |
| 2  | 62  | 53  | 56  | 53 | 56  | 56  | 56  | 59  | 63  | 55  | 47  | 63  |
| 3  | 78  | 56  | 52  | 55 | 63  | 67  | 67  | 72  | 74  | 72  | 66  | 80  |
| 4  | 96  | 57  | 57  | 60 | 67  | 75  | 78  | 75  | 75  | 75  | 84  | 115 |
| 5  | 140 | 104 | 72  | 72 | 76  | 83  | 85  | 80  | 76  | 74  | 88  | 134 |
| 6  | 182 | 100 | 77  | 77 | 87  | 90  | 87  | 84  | 76  | 76  | 83  | 135 |
| 7  |     | 102 | 80  | 80 | 91  | 91  | 91  | 88  | 80  | 78  | 82  | 122 |
| 8  |     | 112 | 95  | 77 | 85  | 87  | 87  | 83  | 80  | 78  | 80  | 125 |
| 9  |     | 128 | 101 | 72 | 72  | 79  | 83  | 81  | 74  | 74  | 77  | 120 |
| 10 |     |     | 84  | 71 | 68  | 68  | 70  | 79  | 74  | 70  | 67  | 126 |
| 11 |     |     |     | 77 | 75  | 75  | 77  | 81  | 78  | 71  | 67  | 144 |
| 12 |     |     |     |    | 153 | 135 | 132 | 158 | 153 | 121 | 110 |     |

### Apparent photonic efficiency

The apparent absorbance of the red component of the dye,  $A(sR)$  was estimated from **Eq. s1**, using the linear red component,  $sR$  for each position within the  $12 \times 12$  grid:

$$A(sR) = \log \frac{sR_0}{sR_{Rz}} \quad (\text{s1})$$

Where  $sR_0$  and  $sR_{Rz}$  are the *intensity* values of the red component of the digital image in the absence and presence of resazurin, respectively. The value for  $sR_0$  was taken as equivalent to 255. The application of this equation requires conversion of *non-linear (gamma)* parameters,  $sR'$ , used for digital imaging treatment, into *linear*  $sR$  counterparts. The mathematical expression to obtain  $sR$  values depends whether  $sR'$  is below, equal to or above 0.0405, according to **Eq. s2** (Yusufu and Mills, *Sens Actuators B Chem* 273, 2018, 1187–1194):

$$\begin{aligned} sR &= 12.92 \cdot sR' && \text{for } sR' \text{ values } \leq 0.0405 \\ sR &= \left( \frac{sR' + 0.055}{1.055} \right)^{2.4} && \text{for } sR' \text{ values } > 0.0405 \end{aligned} \quad (\text{s2})$$

Where  $sR$  and  $sR'$  are given in their fractional form (*i.e.* values between 0–1).  $A(sR)$  curves from pure anatase, r-centre and r-corner films are shown in **Fig S6**.

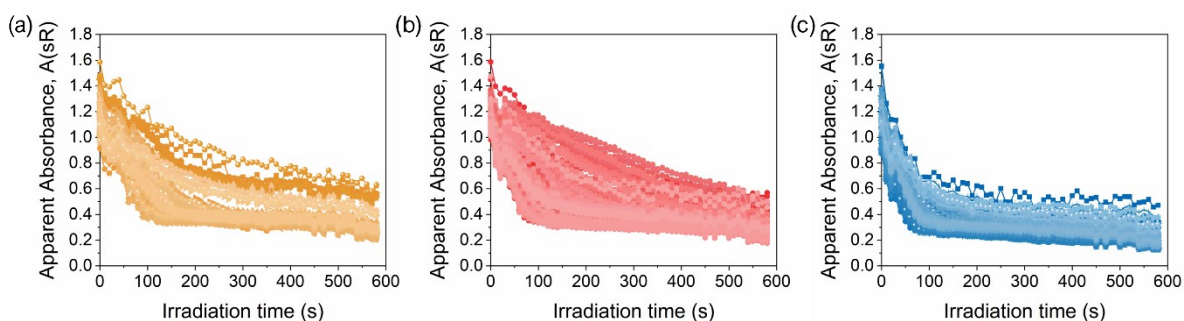

**Fig. S6.** Red component of apparent absorbance,  $A(sR)$  for (a) pure anatase, (b) r-centre and (c) r-corner samples.

The rate of  $R_z$  reduction,  $r$  (Eq. 4) is based on the change in absorbance,  $d|A(sR)|/dt$  as obtained from linear regression of the initial (zero-order) section (**Fig. S7**). This evaluation excluded  $A(sR)$  curves showing an exponential decay. The  $r$  values are listed in **Table S4**.

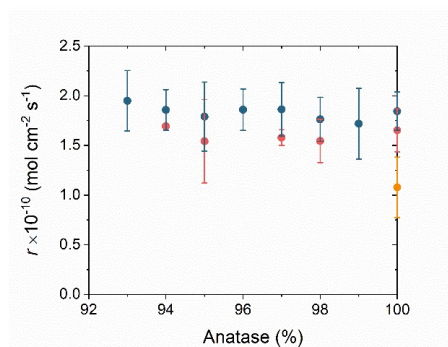

**Fig. S7.** Rate of  $R_z$  reduction,  $r$  (units, mol  $\text{cm}^{-2} \text{s}^{-1}$ ) as a function of surface anatase content (>90%).

**Table S4.** Rate of dye reduction,  $r$  ( $\times 10^{-10}$ ) (units, mol cm<sup>-2</sup> s<sup>-1</sup>) as estimated from Eq. 4, using linear regression of selected  $A(sR)$  curves.

**Anatase**

|    | A | B | C    | D    | E    | F    | G    | H    | I    | J     | K    | L |
|----|---|---|------|------|------|------|------|------|------|-------|------|---|
| 1  |   |   |      |      |      |      |      |      |      |       |      |   |
| 2  |   |   |      |      |      |      |      |      |      | 1.21  | 1.36 |   |
| 3  |   |   |      |      |      |      |      |      | 0.97 | 1.24  | 1.42 |   |
| 4  |   |   |      |      |      |      |      |      | 1.06 | 1.39  | 1.52 |   |
| 5  |   |   |      |      | 0.78 |      |      |      | 1.13 | 1.45  | 1.74 |   |
| 6  |   |   | 0.70 |      | 0.86 | 0.95 | 0.94 | 0.97 |      | 1.57  | 1.70 |   |
| 7  |   |   |      | 0.81 | 0.94 | 0.94 | 0.97 | 1.01 |      | 1.69  | 1.73 |   |
| 8  |   |   |      | 0.82 | 0.90 | 0.91 | 0.95 | 1.04 | 1.34 | 1.53E | 1.48 |   |
| 9  |   |   |      | 0.77 | 0.78 | 0.83 | 0.92 | 0.98 | 1.15 | 1.39  | 1.48 |   |
| 10 |   |   |      | 0.73 | 0.75 | 0.77 | 0.83 | 0.91 | 1.01 | 1.19  | 1.39 |   |
| 11 |   |   |      | 0.67 | 0.71 | 0.71 | 0.77 | 0.82 | 0.88 | 0.98  | 1.09 |   |
| 12 |   |   |      |      |      |      |      |      |      |       |      |   |

**r-centre**

|    | A | B    | C    | D | E | F | G    | H    | I    | J    | K    | L |
|----|---|------|------|---|---|---|------|------|------|------|------|---|
| 1  |   |      |      |   |   |   |      |      |      |      |      |   |
| 2  |   |      |      |   |   |   | 1.69 | 1.81 | 1.87 | 1.91 | 1.63 |   |
| 3  |   |      |      |   |   |   |      |      | 1.47 | 1.69 | 1.61 |   |
| 4  |   |      |      |   |   |   |      |      |      | 1.52 | 1.61 |   |
| 5  |   |      |      |   |   |   |      |      |      |      |      |   |
| 6  |   | 1.45 |      |   |   |   |      |      |      |      | 1.24 |   |
| 7  |   | 1.66 | 1.24 |   |   |   |      |      |      |      | 1.30 |   |
| 8  |   | 1.52 | 1.43 |   |   |   |      |      |      |      | 1.38 |   |
| 9  |   | 1.83 | 1.70 |   |   |   |      |      |      |      | 1.59 |   |
| 10 |   | 1.84 | 1.80 |   |   |   |      |      |      | 1.29 | 1.56 |   |
| 11 |   | 2.01 | 1.93 |   |   |   |      |      |      |      | 1.41 |   |
| 12 |   |      |      |   |   |   |      |      |      |      |      |   |

**r-corner**

|    | A | B    | C    | D    | E    | F    | G    | H    | I    | J    | K    | L |
|----|---|------|------|------|------|------|------|------|------|------|------|---|
| 1  |   |      |      |      |      |      |      |      |      |      |      |   |
| 2  |   | 2.16 | 2.14 | 2.32 | 2.29 | 2.20 | 2.08 | 1.88 | 1.89 | 1.99 | 2.22 |   |
| 3  |   | 1.84 | 1.94 | 1.91 | 1.81 | 1.74 | 1.67 | 1.54 | 1.46 | 1.43 | 1.53 |   |
| 4  |   | 1.71 | 1.77 | 1.78 | 1.74 | 1.73 | 1.66 | 1.67 | 1.63 | 1.52 | 1.28 |   |
| 5  |   |      | 1.45 | 1.70 | 1.73 | 1.80 | 1.79 | 1.81 | 1.82 | 1.67 | 1.34 |   |
| 6  |   |      | 1.41 | 1.70 | 1.80 | 1.94 | 1.99 | 2.03 | 1.99 | 1.80 | 1.47 |   |
| 7  |   |      | 1.59 | 1.76 | 1.91 | 2.05 | 2.08 | 2.07 | 2.00 | 1.86 | 1.63 |   |
| 8  |   |      |      | 1.89 | 1.99 | 2.02 | 2.09 | 2.11 | 2.06 | 1.90 | 1.69 |   |
| 9  |   |      |      | 1.90 | 2.07 | 2.07 | 2.05 | 2.03 | 1.99 | 1.88 | 1.76 |   |
| 10 |   |      | 1.48 | 1.81 | 2.00 | 2.04 | 2.01 | 1.86 | 1.87 | 1.96 | 1.90 |   |
| 11 |   |      |      | 1.56 | 1.73 | 1.70 | 1.78 | 1.66 | 1.72 | 1.90 | 1.83 |   |
| 12 |   |      |      |      |      |      |      |      |      |      |      |   |

An apparent photonic efficiency,  $\xi'$  (units,  $\text{mol}_{\text{Rz}} \text{mol}_{\phi}^{-1}$ ) is given by the rate of dye reduction,  $r$  (Table S3) as a function of incident photon flux,  $\phi$  (Table S1), according to Eq. 5. The resulting  $\xi'$  values are listed in **Table S5**.

**Table S5.** Apparent formal quantum efficiency,  $\xi'$  (units,  $\text{mol}_{\text{Rz}} \text{mol}_{\phi}^{-1}$ ) as estimated from Eq. 5.

**Anatase**

|    | A | B | C      | D      | E      | F      | G      | H      | I      | J      | K      | L |
|----|---|---|--------|--------|--------|--------|--------|--------|--------|--------|--------|---|
| 1  |   |   |        |        |        |        |        |        |        |        |        |   |
| 2  |   |   |        |        |        |        |        |        |        | 0.0210 | 0.0235 |   |
| 3  |   |   |        |        |        |        |        |        | 0.0168 | 0.0216 | 0.0246 |   |
| 4  |   |   |        |        |        |        |        |        | 0.0184 | 0.0241 | 0.0263 |   |
| 5  |   |   |        |        | 0.0137 |        |        |        | 0.0197 | 0.0251 | 0.0302 |   |
| 6  |   |   | 0.0124 |        | 0.0151 | 0.0168 | 0.0165 | 0.0169 |        | 0.0273 | 0.0295 |   |
| 7  |   |   |        | 0.0144 | 0.0166 | 0.0165 | 0.0171 | 0.0177 |        | 0.0294 | 0.0300 |   |
| 8  |   |   |        | 0.0145 | 0.0158 | 0.0159 | 0.0168 | 0.0182 | 0.0233 | 0.0266 | 0.0257 |   |
| 9  |   |   |        | 0.0136 | 0.0137 | 0.0145 | 0.0162 | 0.0171 | 0.0200 | 0.0241 | 0.0256 |   |
| 10 |   |   |        | 0.0129 | 0.0132 | 0.0135 | 0.0146 | 0.0159 | 0.0176 | 0.0207 | 0.0240 |   |
| 11 |   |   |        | 0.0118 | 0.0125 | 0.0126 | 0.0135 | 0.0144 | 0.0154 | 0.0171 | 0.0189 |   |
| 12 |   |   |        |        |        |        |        |        |        |        |        |   |

**r-centre**

|    | A | B      | C      | D | E | F | G      | H      | I      | J      | K      | L     |
|----|---|--------|--------|---|---|---|--------|--------|--------|--------|--------|-------|
| 1  |   |        |        |   |   |   |        |        |        |        |        |       |
| 2  |   |        |        |   |   |   | 0.0287 | 0.0305 | 0.0315 | 0.0321 | 0.0273 |       |
| 3  |   |        |        |   |   |   |        |        | 0.0247 | 0.0284 | 0.0270 |       |
| 4  |   |        |        |   |   |   |        |        |        | 0.0255 | 0.0269 |       |
| 5  |   |        |        |   |   |   |        |        |        |        |        |       |
| 6  |   | 0.0249 |        |   |   |   |        |        |        |        |        | 0.021 |
| 7  |   | 0.0285 | 0.0213 |   |   |   |        |        |        |        |        | 0.022 |
| 8  |   | 0.0262 | 0.0244 |   |   |   |        |        |        |        |        | 0.023 |
| 9  |   | 0.0314 | 0.0291 |   |   |   |        |        |        |        |        | 0.027 |
| 10 |   | 0.0316 | 0.0307 |   |   |   |        |        |        | 0.0216 | 0.026  |       |
| 11 |   | 0.0345 | 0.0330 |   |   |   |        |        |        |        | 0.024  |       |
| 12 |   |        |        |   |   |   |        |        |        |        |        |       |

**r-corner**

|    | A | B      | C      | D      | E      | F      | G      | H      | I      | J      | K      | L |
|----|---|--------|--------|--------|--------|--------|--------|--------|--------|--------|--------|---|
| 1  |   |        |        |        |        |        |        |        |        |        |        |   |
| 2  |   | 0.0359 | 0.0354 | 0.0383 | 0.0376 | 0.0360 | 0.0342 | 0.0310 | 0.0312 | 0.0329 | 0.0369 |   |
| 3  |   | 0.0305 | 0.0321 | 0.0316 | 0.0298 | 0.0286 | 0.0274 | 0.0253 | 0.0242 | 0.0237 | 0.0254 |   |
| 4  |   | 0.0284 | 0.0292 | 0.0294 | 0.0286 | 0.0283 | 0.0273 | 0.0276 | 0.0270 | 0.0253 | 0.0213 |   |
| 5  |   |        | 0.0240 | 0.0281 | 0.0285 | 0.0294 | 0.0294 | 0.0298 | 0.0301 | 0.0277 | 0.0224 |   |
| 6  |   |        | 0.0232 | 0.0279 | 0.0295 | 0.0318 | 0.0326 | 0.0335 | 0.0328 | 0.0299 | 0.0244 |   |
| 7  |   |        | 0.0263 | 0.0290 | 0.0314 | 0.0335 | 0.0341 | 0.0342 | 0.0331 | 0.0309 | 0.0271 |   |
| 8  |   |        |        | 0.0312 | 0.0326 | 0.0332 | 0.0343 | 0.0348 | 0.0341 | 0.0315 | 0.0280 |   |
| 9  |   |        |        | 0.0313 | 0.0341 | 0.0339 | 0.0337 | 0.0335 | 0.0329 | 0.0312 | 0.0293 |   |
| 10 |   |        | 0.0244 | 0.0298 | 0.0329 | 0.0334 | 0.0331 | 0.0306 | 0.0309 | 0.0324 | 0.0315 |   |
| 11 |   |        |        | 0.0256 | 0.0285 | 0.0279 | 0.0292 | 0.0273 | 0.0284 | 0.0315 | 0.0305 |   |
| 12 |   |        |        |        |        |        |        |        |        |        |        |   |
